# Supplementary material for: Downregulation of RIG-I mediated by ITGB3/c-SRC/STAT3 signaling confers resistance to interferon-α-induced apoptosis in tumor-repopulating cells of melanoma
Source: PubMed Central journal article supplement — J Immunother Cancer. 2020 Mar 8;8(1):e000111. doi: 10.1136/jitc-2019-000111 (PMC7061898; doi:10.1136/jitc-2019-000111), 2020-03-08
Supplement: jitc-2019-000111supp001.pdf [file jitc-2019-000111supp001.pdf]

Supplementary Table S1. The sequences of primers for RT-PCR.

| Target mRNA   | Primer  | Sequence                |
|---------------|---------|-------------------------|
| Human PML     | Forward | GGATGAAGTGCTACGCCTCG    |
|               | Reverse | TCCCCTGGGTGATGCAAGA     |
| Murine Pml    | Forward | TGAACCAGTTTCCGTGCAGAA   |
|               | Reverse | TGAAATTCCTCCTGTATGGCTTG |
| Human TRAIL   | Forward | TGCGTGCTGATCGTGATCTTC   |
|               | Reverse | GCTCGTTGGTAAAGTACACGTA  |
| Murine Trail  | Forward | ATGGTGATTGTCATAGTGCTCC  |
|               | Reverse | GCAAGCAGGGTCTGTTCAAGA   |
| Human OAS1    | Forward | AGTTGACTGGCGGCTATAAAC   |
|               | Reverse | GTGCTTGACTAGGCGGATGAG   |
| Murine Oas1   | Forward | GGCCTCTAAAGGGGTCAAG     |
|               | Reverse | TCAAACCTCACTCCACAACGTC  |
| Human RIG-I   | Forward | CTGGACCCTACCTACATCCTG   |
|               | Reverse | GGCATCCAAAAAGCCACGG     |
| Murine RIG-I  | Forward | CAGATCCGAGACACTAAAGGGA  |
|               | Reverse | TCCTCATCAGCCTTGCTTTCA   |
| Human OCT3/4  | Forward | CTTGAATCCCGAATGGAAAGGG  |
|               | Reverse | GTGTATATCCCAGGGTGATCCTC |
| Murine Oct3/4 | Forward | CACCATCTGTCGCTTCGAGG    |
|               | Reverse | AGGGTCTCCGATTTGCATATCT  |
| Human NANOG   | Forward | AAGGTCCCGGTCAAGAAACAG   |
|               | Reverse | CTTCTGCGTCACACCATTCG    |
| Murine Nanog  | Forward | AGGACAGGTTTCAGAAGCAGA   |
|               | Reverse | CCATTGCTAGTCTTCAACCACTG |
| Human SOX-2   | Forward | TGGACAGTTACGCGCACAT     |
|               | Reverse | CGAGTAGGACATGCTGTAGGT   |
| Murine Sox-2  | Forward | GCGGAGTGGAACCTTTTGTCC   |

---

|                        |         |                        |
|------------------------|---------|------------------------|
|                        | Reverse | CGGGAAGCGTGTACTTATCCTT |
| Human STAT3            | Forward | CAGCAGCTTGACACACGGTA   |
|                        | Reverse | AAACACCAAAGTGGCATGTGA  |
| Human $\beta$ -actin   | Forward | CATGTACGTTGCTATCCAGGC  |
|                        | Reverse | CTCCTTAAT GTCACGCACGAT |
| Murine $\beta$ -actin, | Forward | GGCTGTATTCCCCTCCATCG   |
|                        | Reverse | CCAGTTGGTAACAATGCCATGT |

---

Fig S1

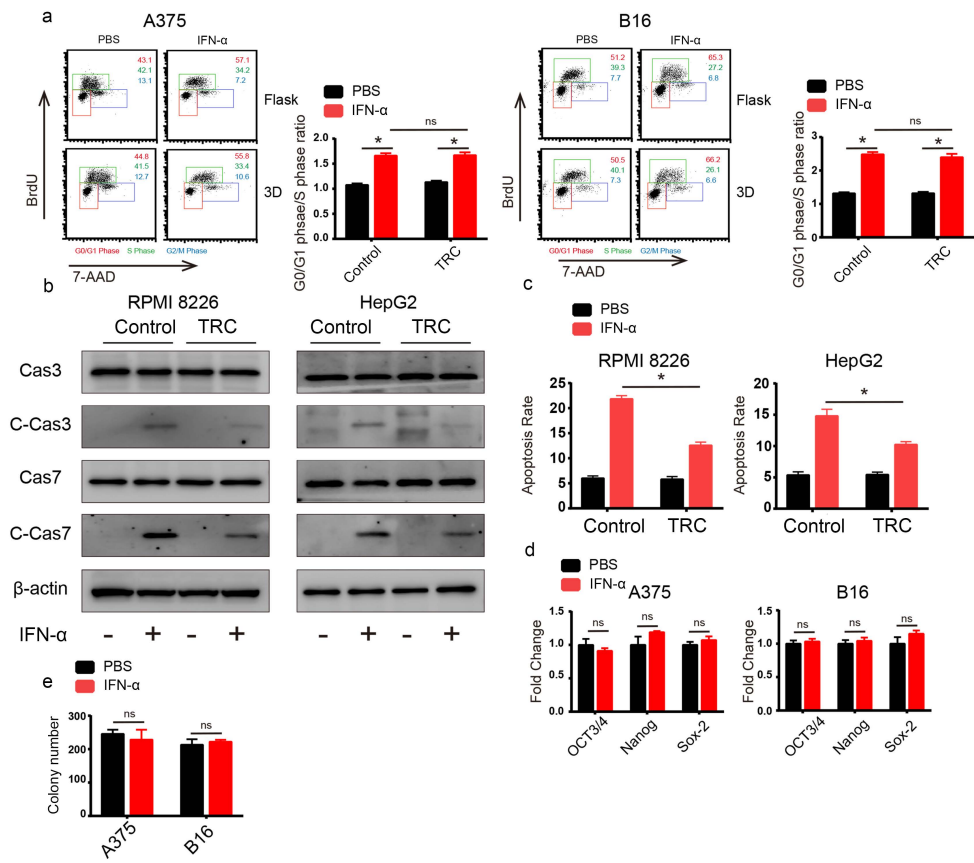

Fig S2

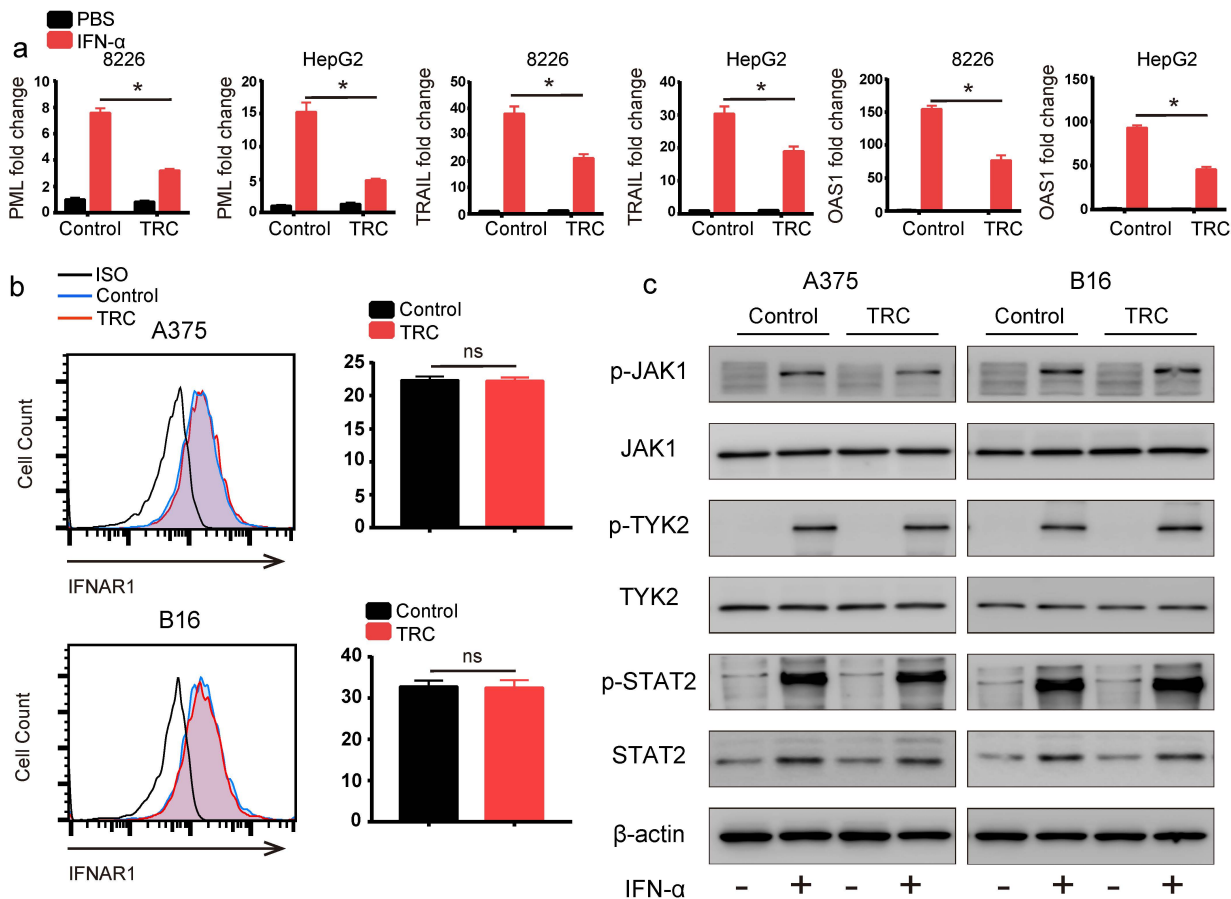

Fig S3

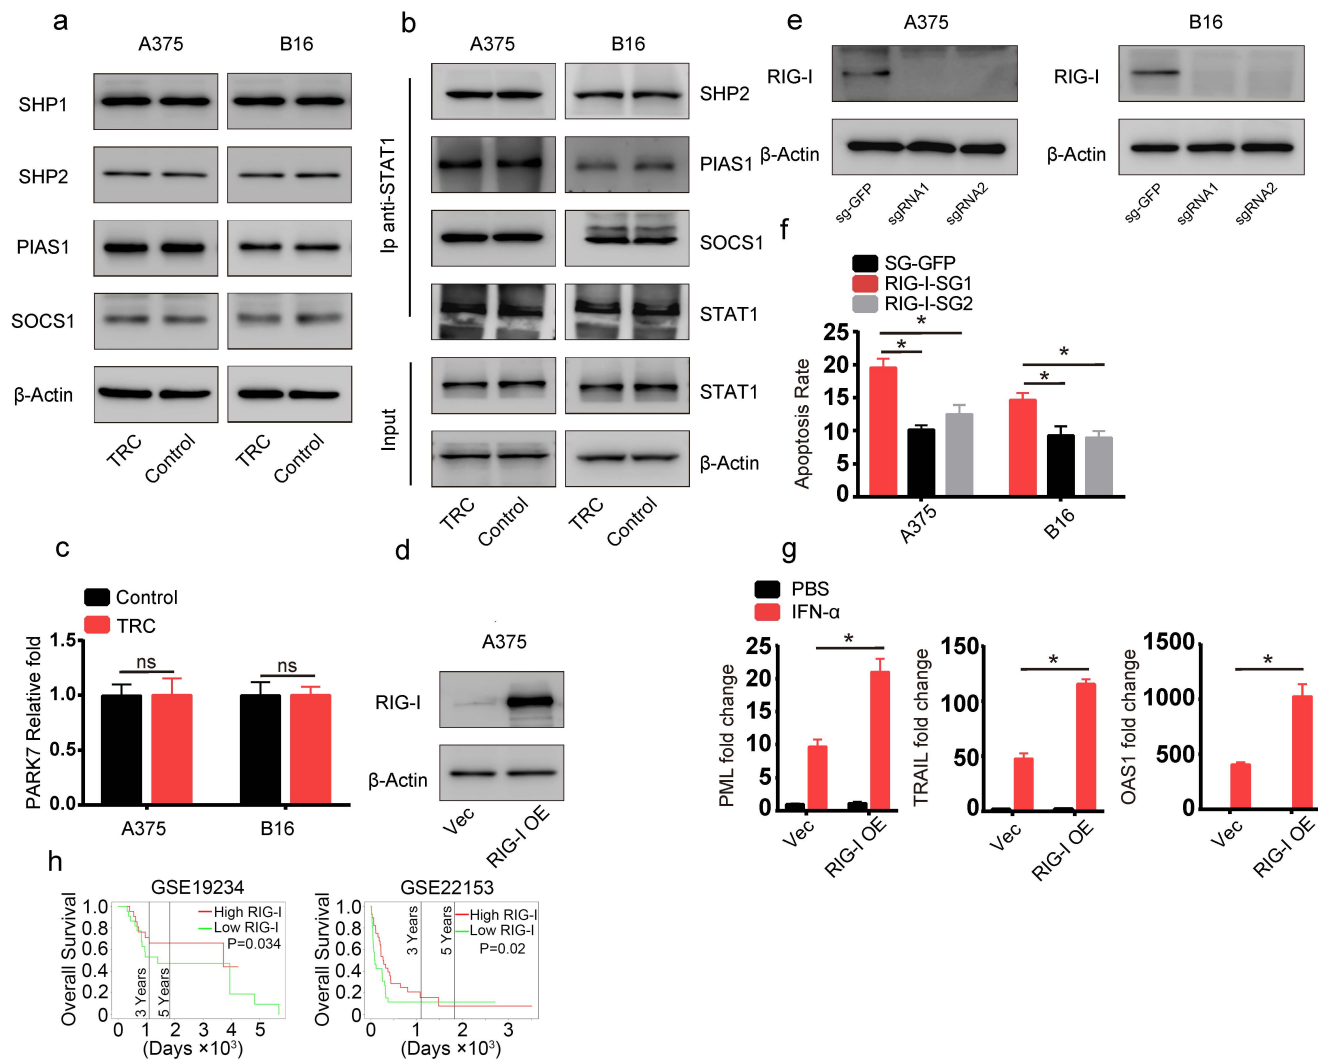

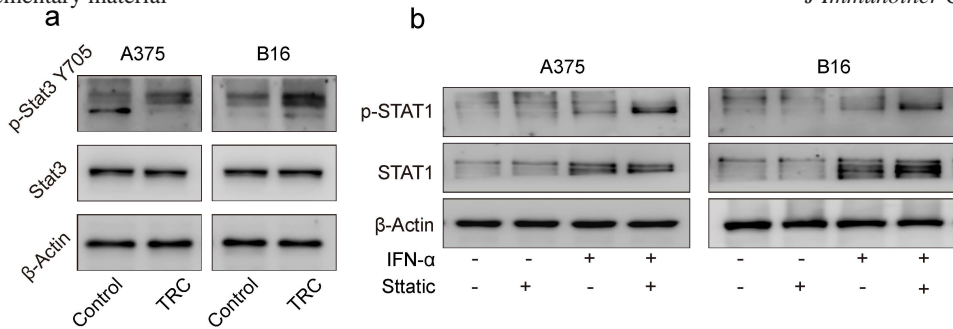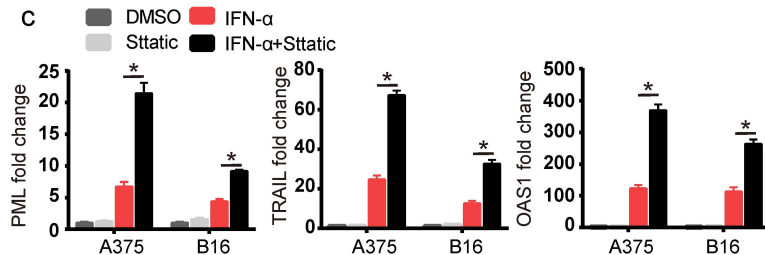

Fig S5

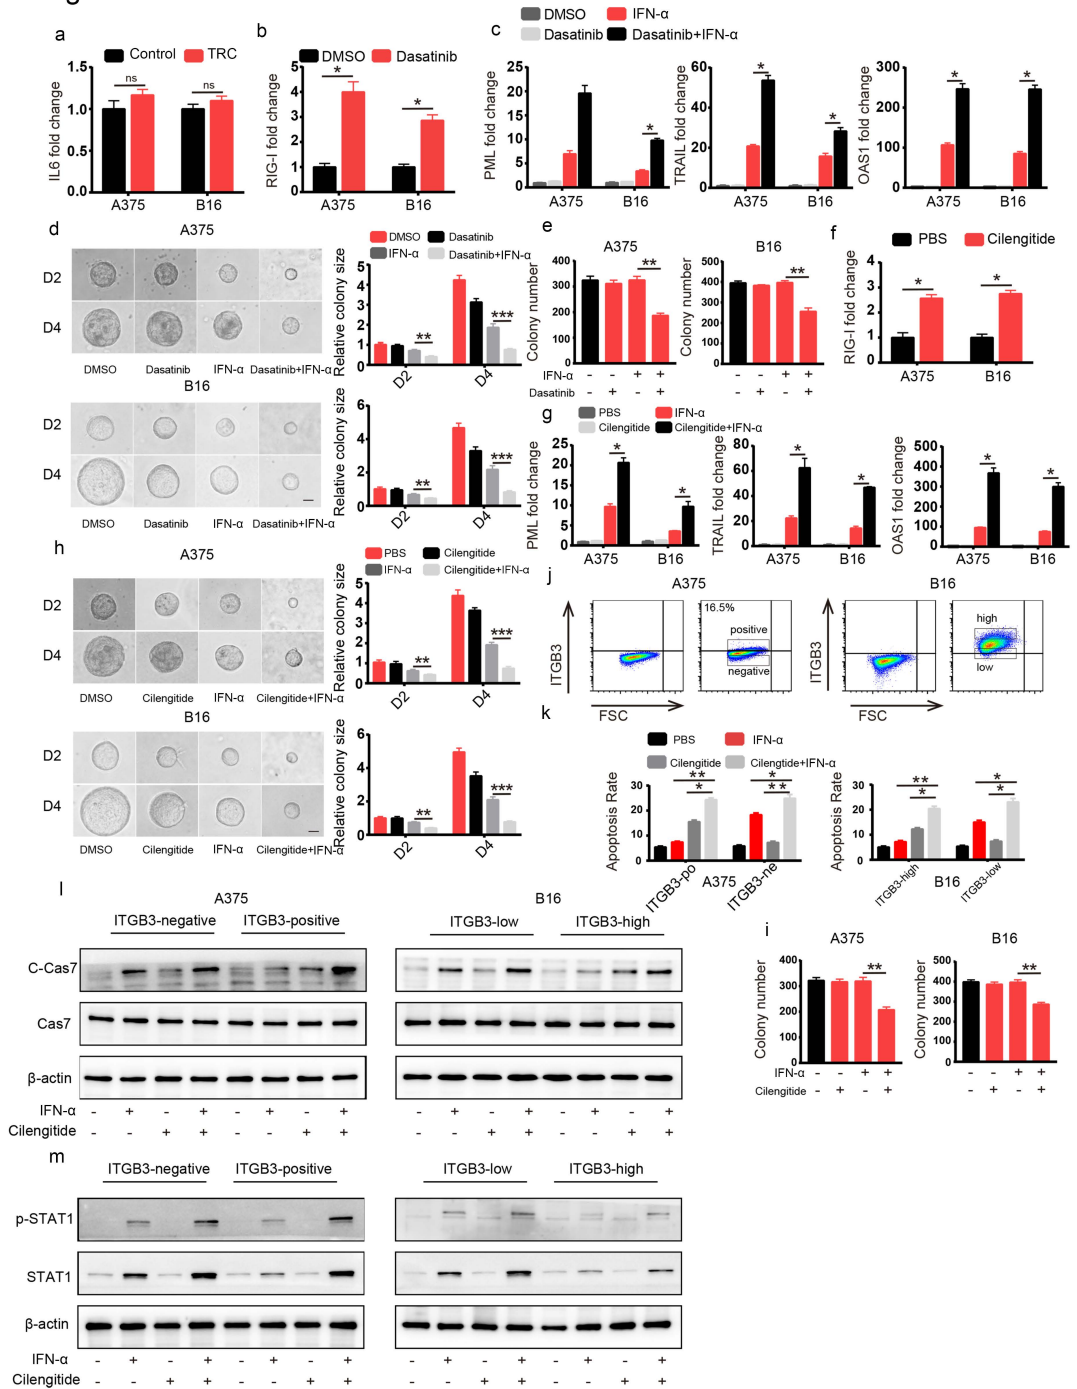

## 1 **Supplementary Figure legends**

2 **Figure S1.**(a) B16 TRCs and A375 TRCs were treated with 1000 U/mL human  
3 recombinant IFN- $\alpha$  or 200 ng/mL murine recombinant IFN- $\alpha$  for 48 h. Cells were  
4 collected, and analysed cell cycle with BD cell-cycle analysing kit. Flask-cultured  
5 tumor cells were used as control (b) RPMI 8226 TRCs and HepG2 TRCs were treated  
6 with 1000 U/mL human recombinant IFN- $\alpha$  for 48 h. Cell lysates were collected, and  
7 caspase 3, caspase 7 and their cleaved forms were analysed by immunoblotting. Flask-  
8 cultured tumor cells were used as control. (c) RPMI 8226 TRCs and HepG2 TRCs were  
9 treated with 1000 U/mL human recombinant IFN- $\alpha$  for 48 h. The cells were isolated,  
10 stained with annexin V and 7-AAD and analysed by flow cytometry. Columns indicate  
11 three independent replicate experiments. Flask-cultured tumor cells were used as  
12 control. (d) A375 and B16 TRCs were treated with 1000 U/mL human recombinant  
13 IFN- $\alpha$  or 200 ng/mL murine recombinant IFN- $\alpha$  for 48 h. Total RNA was extracted and  
14 reverse transcribed, and gene expression was analysed by RT-qPCR.(e) A375 and B16  
15 TRCs were treated with 1000 U/mL human recombinant IFN- $\alpha$  or 200 ng/mL murine  
16 recombinant IFN- $\alpha$  for 48 h. Cells were collected and seeded on corning ultra-low  
17 adhesion plate with 1000 cells/ml. Cultured with serum free DMEM-F12 containing  
18 B27,20ng/ml EGF, 0.4% bovine serum albumin, and 4 mg/ml insulin. After culturing  
19 for ten days, the spheres were counted. The data shown are representative of three  
20 independent experiments and represent the mean $\pm$  S.E.M. (indicated by errors bars). \* $P$   
21  $< 0.05$ .

22 **Figure S2.** (a) RPMI 8226 TRCs and HepG2 TRCs were treated with 1000 U/mL  
23 human recombinant IFN- $\alpha$  for 24 h. Total RNA was extracted and reverse transcribed,  
24 and gene expression was analysed by RT-PCR with specific primers for PML, TRAIL  
25 and OAS1. Flask-cultured tumor cells were used as control. (b) A375 TRCs and B16  
26 TRCs were isolated, stained with anti-IFNAR1 and analysed by flow cytometry. Flask-  
27 cultured tumor cells were used as control. Columns indicate three independent replicate  
28 experiments. (c) A375 TRCs and B16 TRCs were treated with 1000 U/mL human  
29 recombinant IFN- $\alpha$  or 200 ng/mL murine recombinant IFN- $\alpha$  for 6 h, and cell lysates



1 were collected and analysed by immunoblotting. The data shown are representative of  
2 three independent experiments and represent the mean± S.E.M. (indicated by error  
3 bars). ns: not significant, \*P < 0.05.

4 **Figure S3.** (a) The lysates of flask-cultured control cells and TRCs of A375 or B16  
5 cells were analysed by immunoblotting using the indicated antibodies. (b) A375 TRCs  
6 and B16 TRCs were treated with 1000 U/mL human recombinant IFN- $\alpha$  or 200 ng/mL  
7 murine recombinant IFN- $\alpha$  for 6 h. Cell lysates were collected for immunoprecipitation  
8 with anti-STAT1 antibody, and protein interactions were analysed by immunoblotting  
9 with the indicated antibodies. Flask-cultured tumor cells were used as control. (c) Total  
10 RNA from TRCs of A375 or B16 and flask-cultured control tumor cells was extracted,  
11 reverse transcribed and analysed with specific primers for PARK7. (d) RIG-I  
12 overexpression in A375 cells was verified via immunoblotting with anti-RIG-I antibody.  
13 (e) RIG-I knockout in A375 and B16 cells by CRISPR/Cas9 was verified via  
14 immunoblotting with anti-RIG-I antibody. (f) Flask-cultured RIG-I knockout A375 and  
15 B16 cells generated by CRISPR targeting were treated with 1000 U/mL human  
16 recombinant IFN- $\alpha$  or 200 ng/mL murine recombinant IFN- $\alpha$  for 48 h. Cells were  
17 isolated and stained with annexin V and 7-AAD and analysed by flow cytometry.  
18 Columns indicate three independent replicate experiments. (g) TRCs of A375 RIG-I-  
19 overexpressing cells and control cells were treated with human recombinant IFN- $\alpha$  for  
20 24 h. The total RNA was extracted and gene expression was analysed by RT-qPCR. (h)  
21 Two melanoma datasets obtained from Gene Expression Omnibus (GEO) profiles  
22 (PROGgeneV2) and clinical data were analysed via Kaplan-Meier survival analysis  
23 The data shown are representative of three independent experiments and represent the  
24 mean± S.E.M. (indicated by errors bars). ns: not significant.

25 **Figure S4.** (a) Cell lysates from A375 TRCs and B16 TRCs were extracted and  
26 analysed via immunoblotting with the indicated antibodies. Flask-cultured tumor cells  
27 were used as control. (b) A375 TRCs and B16 TRCs were pretreated with stattic (1  $\mu$ M)  
28 for 12 h and then treated with human recombinant IFN- $\alpha$  (1000 U/mL) and murine  
29 recombinant IFN- $\alpha$  (200 ng/mL) for 6 h. Cell lysates were extracted and analysed via

1 immunoblotting with the indicated antibodies. (c) A375 TRCs and B16 TRCs were  
2 pretreated with static (1  $\mu$ M) for 12 h and then treated with human recombinant IFN-  
3  $\alpha$  (1000 U/mL) and murine recombinant IFN- $\alpha$  (200 ng/mL) for 16 h. Total RNA from  
4 TRCs was extracted, reverse transcribed and analysed by RT-PCR with specific primers  
5 for PML, TRAIL and OAS1. The data shown are representative of three independent  
6 experiments and represent the mean  $\pm$  S.E.M. (indicated by error bars). ns: not  
7 significant, \* $P < 0.05$ .

8 **Figure S5.** (a) The expression of IL6 in A375 TRCs and B16 TRCs was analyzed by  
9 RT-qPCR. (b) A375 TRCs and B16 TRCs were treated with dasatinib (1  $\mu$ M) for 12h.  
10 The expression of RIG-I was analyzed by RT-qPCR. (c) A375 TRCs and B16 TRCs  
11 were pretreated with dasatinib (1  $\mu$ M) for 12h and then treated with 1000 U/mL human  
12 recombinant IFN- $\alpha$  or 200 ng/mL murine recombinant IFN- $\alpha$  for 24 h. The expression  
13 of PML, TRAIL and OAS1 was analyzed by RT-qPCR. (d-e) A375 and B16 cells were  
14 seeded in fibrin, and after two days, the cells were treated with dasatinib (1  $\mu$ M), IFN-  
15  $\alpha$  (1000 U/mL for A375 cells, 200 ng/mL for B16 cells) or both for 4 days (d). The  
16 colonies size was determined at day 2. Scale bar: 25  $\mu$ m (e) The numbers of colonies  
17 were counted at day 4. (f) A375 TRCs and B16 TRCs were treated with cilengitide (1  
18  $\mu$ M) for 12 h. The expression of RIG-I was analyzed by RT-qPCR. (g) A375 TRCs and  
19 B16 TRCs were pretreated with cilengitide (1  $\mu$ M) for 12 h and then treated with 1000  
20 U/mL human recombinant IFN- $\alpha$  or 200 ng/mL murine recombinant IFN- $\alpha$  for 24 h.  
21 The expression of PML, TRAIL and OAS1 were analyzed by RT-qPCR. (h-i) A375 and  
22 B16 cells were seeded in fibrin, and after two days, the cells were treated with  
23 cilengitide (1  $\mu$ M), IFN- $\alpha$  (1000 U/mL for A375 cells, 200 ng/mL for B16 cells) or both  
24 for 4 days (h). The colonies size was determined at day 2. Scale bar: 25  $\mu$ m (i) The  
25 numbers of colonies were counted at day4. (j) Representative images of sorting strategy.  
26 (k-m) The sorted cells were seeded in 6-well plate after 12h, the cells were treated with  
27 cilengitide (1 $\mu$ M), IFN- $\alpha$  (human recombinant IFN- $\alpha$  (1000 U/mL) and murine  
28 recombinant IFN- $\alpha$  (200 ng/mL)) or cilengitide/IFN- $\alpha$  for 2 days. (k) Cells were  
29 collected and analysed apoptosis via flow cytometry. (l-m) Cell lysates were collected

- 1 and analysed via immunoblotting with the indicated antibodies. The data shown are
- 2 representative of three independent experiments and represent the mean± S.E.M.
- 3 (indicated by error bars). ns: not significant, \* $P < 0.05$ , \*\* $P < 0.01$ , \*\*\* $P < 0.001$ .
